# Supplementary material
Source: PubMed Central journal article supplement (PMC6810856)
Supplement: NIHMS1538375-supplement-1.pdf [file NIHMS1538375-supplement-1.pdf]

## Supplemental Figure 1

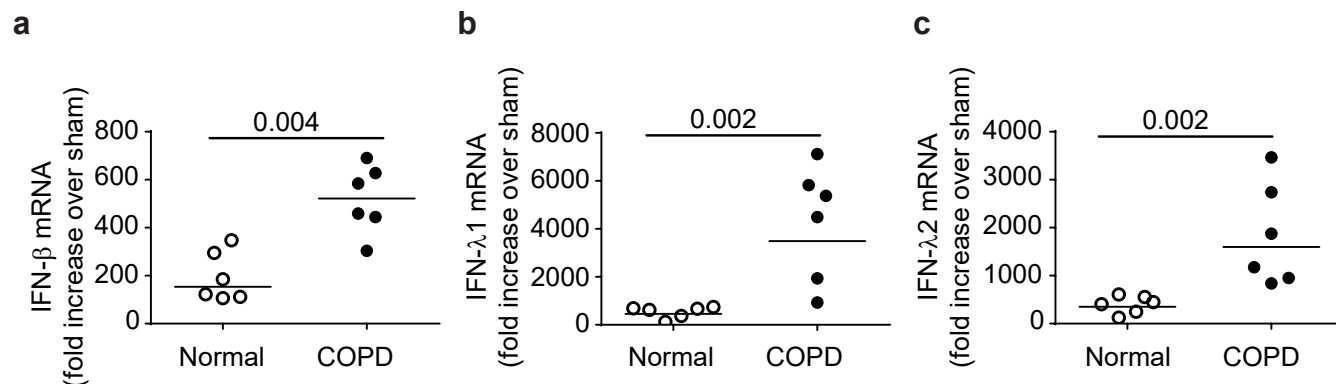

Supplemental Figure 1. Incubation at 37°C enhances RV-induced expression of IFNs in both normal and COPD. Normal and COPD mucociliary-differentiated airway epithelial cell cultures established from airway basal cells isolated from 6 normal and 6 COPD donors were infected with sham or RV and incubated for 24 h at 37°C. IFN expression was determined by qPCR (a – c), data was normalized to house-keeping gene, G3PDH, and expressed as fold increase over respective sham controls. Statistical significance was determined by Wilcoxon rank-sum test.

## Supplemental Figure 2

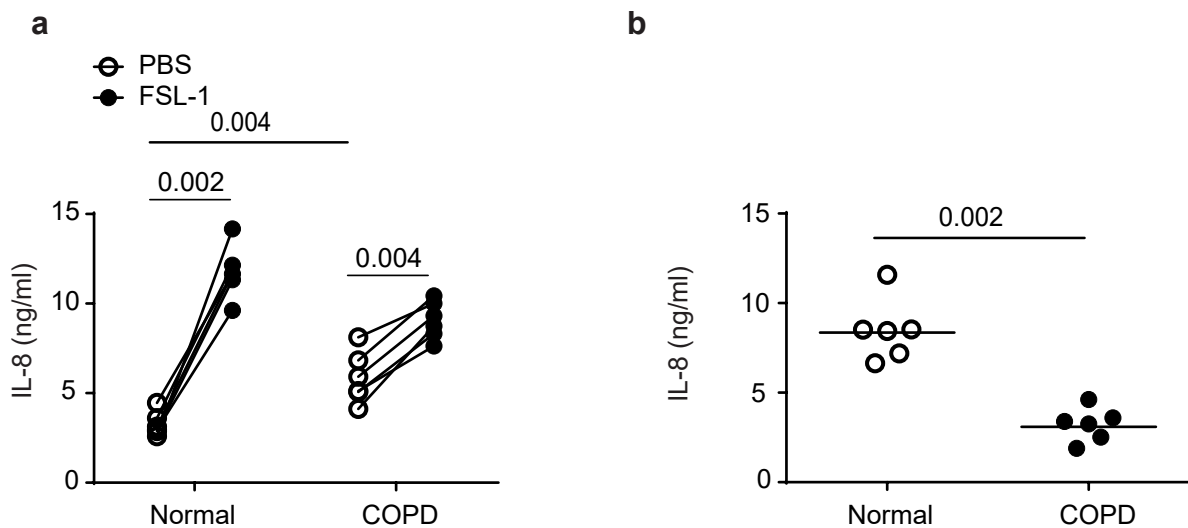

Supplemental Figure 2. COPD cells show suppressed IL-8 responses to TLR2 agonist FSL-1. Normal and COPD cell cultures were treated with 10 ng/ml FSL-1 both apically and basolaterally, incubated for 24 hours and IL-8 was measured in the basolateral medium by ELISA (a and b). Data represent median with range. Data in a represent paired comparison analyzed by sign rank test. Data in b was analyzed by Wilcoxon rank-sum test.
